# Supplementary material for: Early and Non-invasive Diagnosis of Aspergillosis Revealed by Infection Kinetics Monitored in a Rat Model
Source: PubMed Central journal article supplement (PMC6186828; doi:10.3389/fmicb.2018.02356), 2018-10-08
Supplement: Data_Sheet_1.pdf [file Data_Sheet_1.pdf]

## Supplementary Information

### Early and non-invasive diagnosis of aspergillosis revealed by infection kinetics monitored in a rat model

Anton Skriba<sup>1,§</sup>, Tomas Pluhacek<sup>1,2,§</sup>, Andrea Palyzova<sup>1</sup>, Zbynek Novy<sup>3</sup>, Karel Lemr<sup>1,2</sup>, Marian Hajduch<sup>3</sup>, Milos Petrik<sup>3,\*</sup>, Vladimir Havlicek<sup>1,2,\*</sup>

<sup>1</sup>Institute of Microbiology of the Czech Academy of Sciences, Prague 4, 142 20, Czechia

<sup>2</sup>Regional Centre of Advanced Technologies and Materials, Department of Analytical Chemistry, Olomouc, 771 46, Czechia

<sup>3</sup>Institute of Molecular and Translational Medicine, Faculty of Medicine and Dentistry, Palacky University, Olomouc, Czechia

\*Corresponding authors, §Both authors contributed equally

#### Table of contents:

**Figure S1:** Calibration plots of Fe-FC (top) and Fe-TAFC (bottom) adjusted to the Fe-FOXE signal. Fe-FC concentration points were 0,05; 0,1, 0,5; 1; 5; 10; 50; 100; 500; 1,000; 5,000 and 1,000 ng/mL.

**Figure S2:** Fe-TAFC concentration detected in rat urine in the HD and LD infection models. Fe-TAFC concentration detected in rat urine is plotted in a logarithmic scale. A hash (#) denotes the Fe-TAFC concentration below the limit of detection, while an asterisk (\*) denotes the Fe-TAFC concentration below limit of quantification. Missing bars at 48h – D6 post-infection indicate animal death.

**Figure S3:** Whole body three-dimensional volume-rendered PET/CT images of <sup>68</sup>Ga-TAFC in infected (yellow arrow indicates the infection) and non-infected rats. **(A)** PET/CT images of high-dose infected animals on the day of infection (on the left) and three days after inoculation (on the right). **(B)** PET/CT images of low-dose-infected animals on the day of infection (on the left) and ten days after inoculation (on the right). **(C)** PET/CT images of non-infected animals at the beginning (on the left) and at the end (on the right) of the experiment. S = site of injection, K = kidneys, G = gastrointestinal tract, U = urinary bladder.

**Figure S4:** Mutual comparison of siderophore (top) and 1,3-β-D-glucan (bottom) assays. Serum samples in the high-dose (HD1, HD2, HD4-HD7) low-dose (LD1-LD9) and control groups (CTRL1-CTRL3) (all collected at the end of the experiment) are represented by red, blue and orange colors, respectively. The BDG cut-off value defining positivity is 80 pg/mL, and the upper limit is 617 pg/mL. ND: not detected.

**Figure S5:** The mean Fe-FC concentrations detected in rat urine in the HD infection model.

**Supplementary Table S1:** The sensitivity and specificity of LC-CASI-FTMS determination of Fe-FC and Fe-TAFC kinetics in the high-dose model.

**Supplementary Table S2:** Urine BDG testing in rats LD5 and HD6 indicating false-positive results for the data points preceding the inoculation. Note: The BDG assay was not fully standardized for urine analysis.

**Supplementary Table S3:** Technical variability expressed as the coefficient of variation (CV) for each group of technical replications.

**Supplementary Table S4:** The variability in biological replicates expressed as the coefficient of variation (CV) in the high-dose-infected animals. SEM: the standard error of the mean.

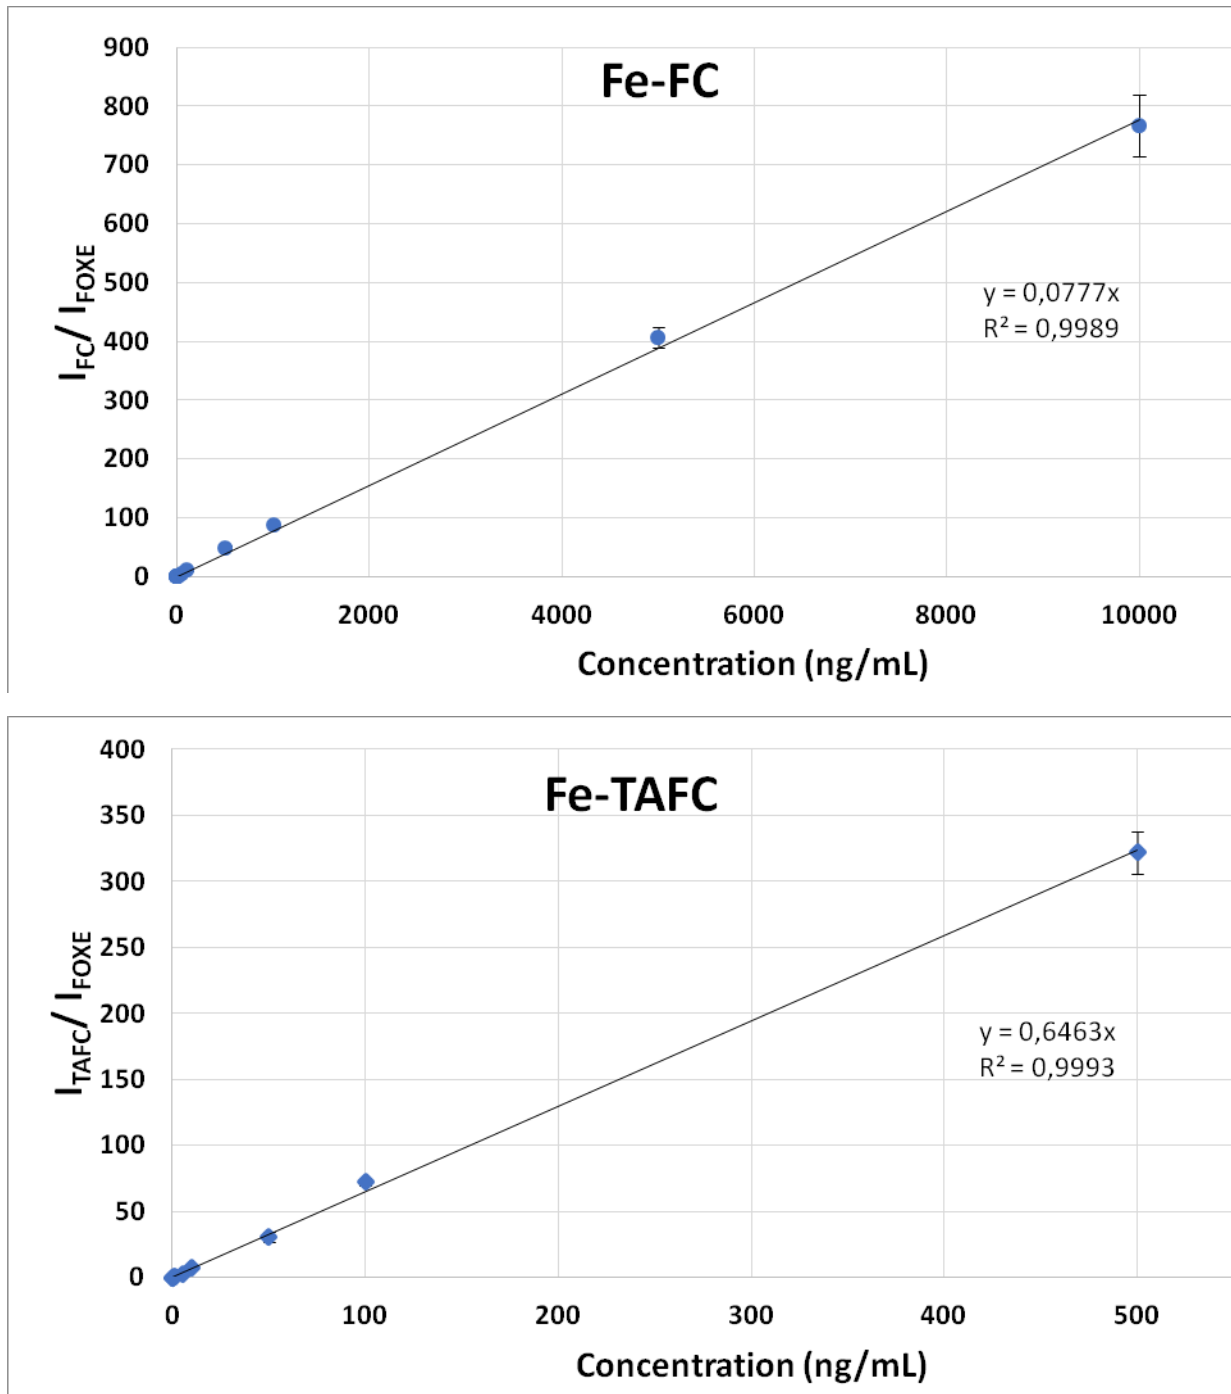

**Figure S1:** Calibration plots of Fe-FC (top) and Fe-TAFC (bottom) adjusted to the Fe-FOX E signal. Fe-FC concentration points were 0,05; 0,1, 0,5; 1; 5; 10; 50; 100; 500; 1,000; 5,000 and 1,000 ng/mL.

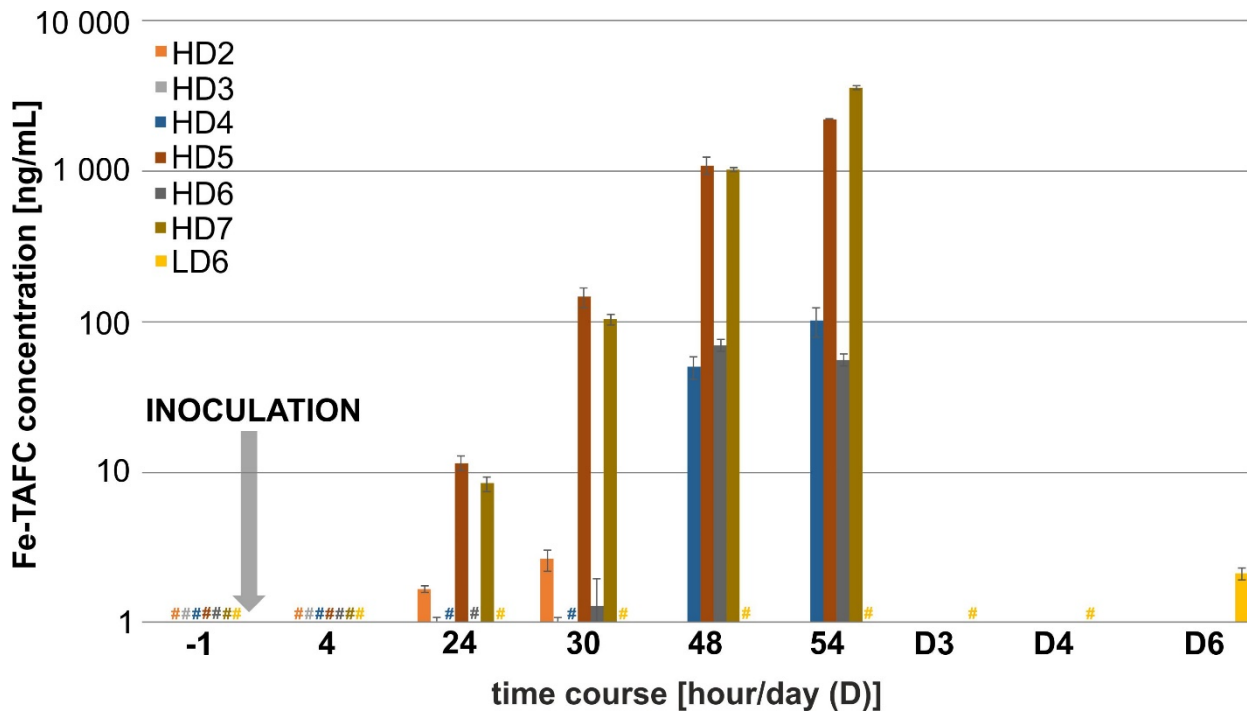

**Figure S2:** Fe-TAFC concentration detected in rat urine in the HD and LD infection models. Fe-TAFC concentration detected in rat urine is plotted in a logarithmic scale. A hash (#) denotes the Fe-TAFC concentration below the limit of detection, while an asterisk (\*) denotes the Fe-TAFC concentration below limit of quantification. Missing bars at 48h – D6 post-infection indicate animal death.

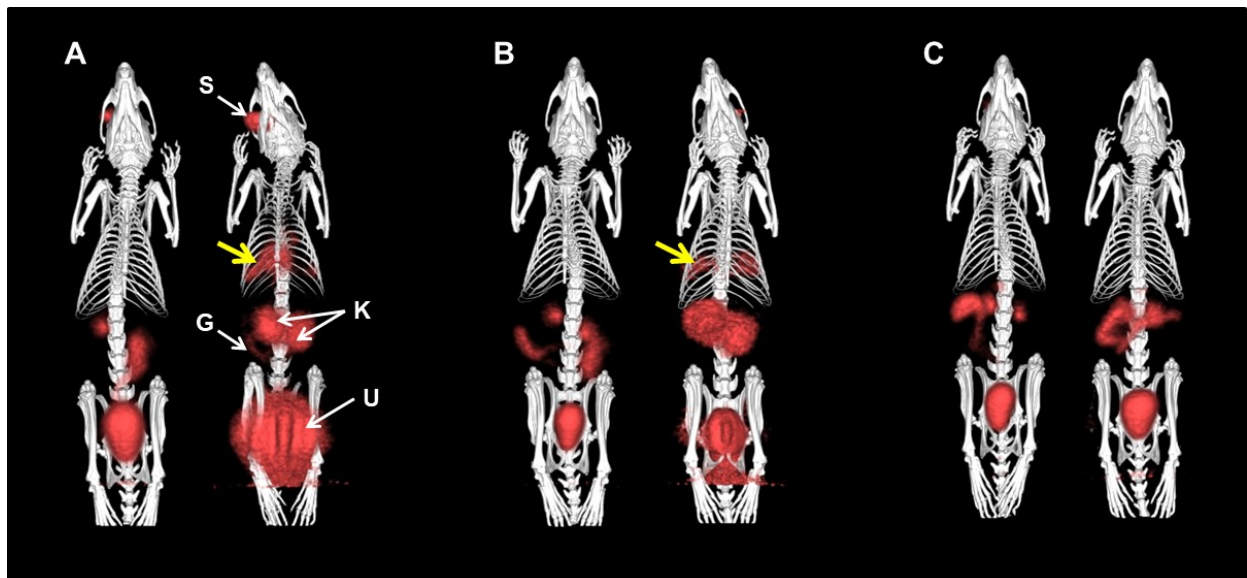

**Figure S3:** Whole body three-dimensional volume-rendered PET/CT images of  $^{68}\text{Ga}$ -TAFC in infected (yellow arrow indicates the infection) and non-infected rats. **(A)** PET/CT images of high-dose-infected animals on the day of infection (on the left) and three days after inoculation (on the right). **(B)** PET/CT images of low-dose-infected animals on the day of infection (on the left) and ten days after inoculation (on the right). **(C)** PET/CT images of non-infected animals at the beginning (on the left) and at the end (on the right) of the experiment. S = site of injection, K = kidneys, G = gastrointestinal tract, U = urinary bladder.

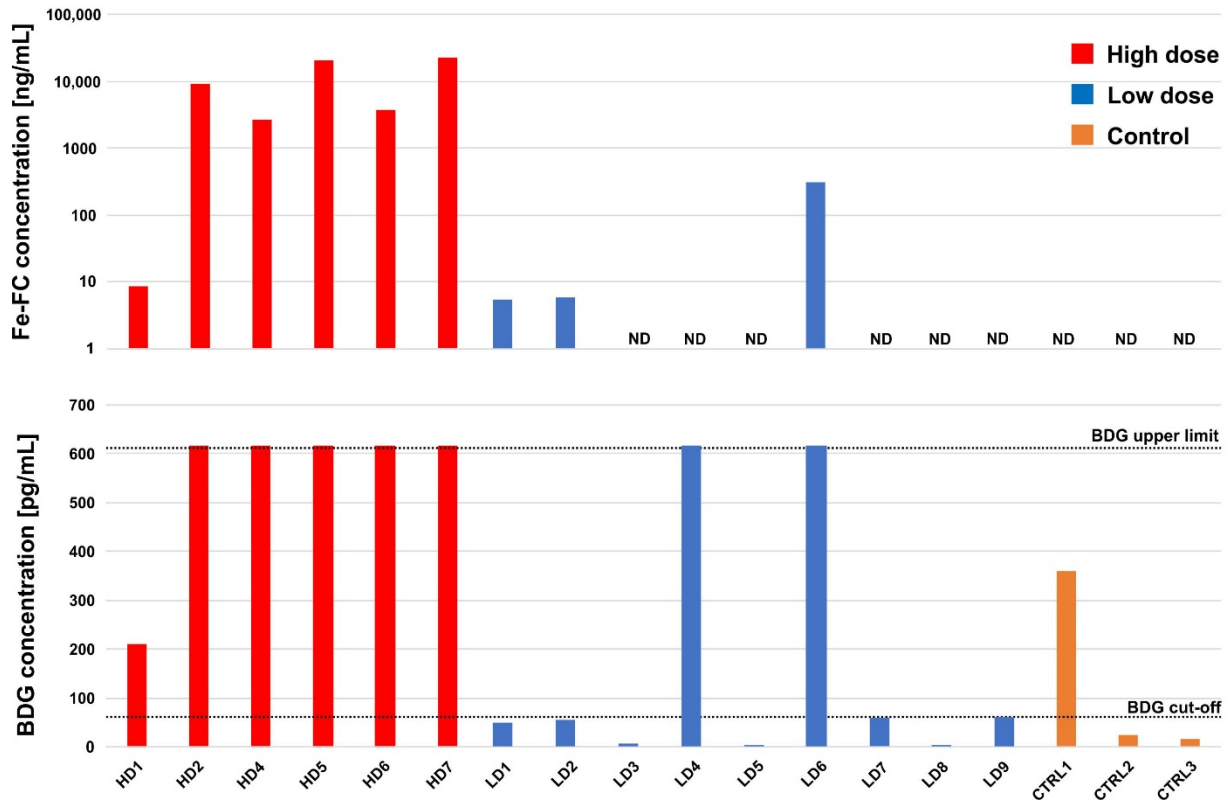

**Figure S4:** Mutual comparison of siderophore (top) and 1,3-β-D-glucan (bottom) assays. Serum samples in the high-dose (HD1, HD2, HD4-HD7) low-dose (LD1-LD9) and control groups (CTRL1-CTRL3) (all collected at the end of the experiment) are represented by red, blue and orange colors, respectively. The BDG cut-off value defining positivity is 80 pg/mL, and the upper limit is 617 pg/mL. ND: not detected.

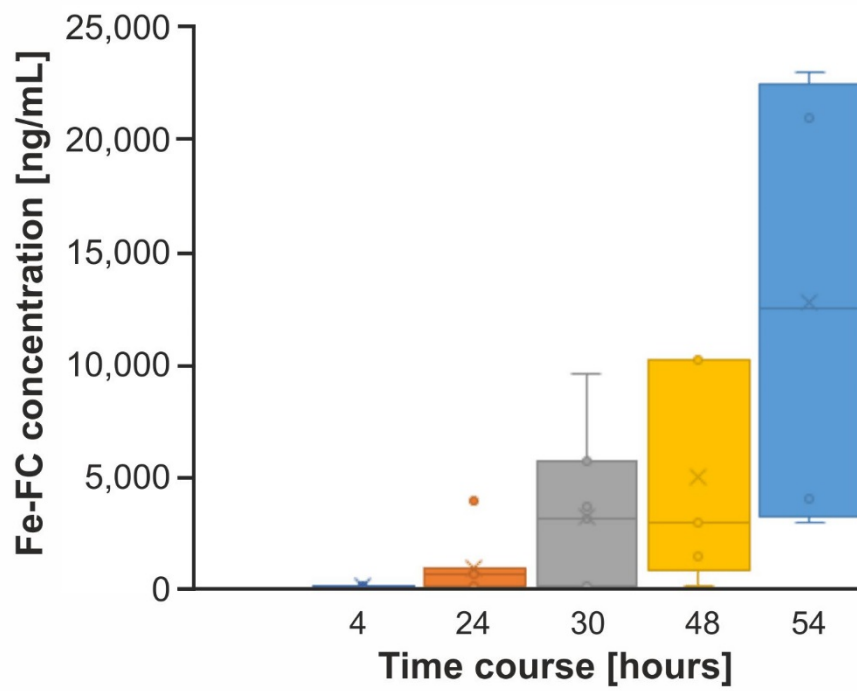

**Figure S5:** The mean Fe-FC concentrations detected in rat urine in the HD infection model.

**Supplementary Table S1:** The sensitivity and specificity of LC-CASI-FTMS determination of Fe-FC and Fe-TAFC kinetics in the high-dose model.

| Time after inoculation | Fe-FC           |                 | Fe-TAFC         |                 |
|------------------------|-----------------|-----------------|-----------------|-----------------|
|                        | Sensitivity (%) | Specificity (%) | Sensitivity (%) | Specificity (%) |
| 4 h                    | 100 (7/7)       | 100 (3/3)       | 0 (0/7)         | 100 (3/3)       |
| 24 h                   | 100 (7/7)       | 100 (3/3)       | 57 (4/7)        | 100 (3/3)       |
| 30 h                   | 100 (7/7)       | 100 (3/3)       | 71 (5/7)        | 100 (3/3)       |
| 48 h                   | 100 (5/5)       | 100 (3/3)       | 80 (4/5)        | 100 (3/3)       |
| 54 h                   | 100 (4/4)       | 100 (3/3)       | 100 (4/4)       | 100 (3/3)       |

**Supplementary Table S2:** Urine BDG testing in rats LD5 new and HD6 indicating false-positive results for the data points preceding the inoculation. Note: The BDG assay was not fully standardized for urine analysis.

| LD5        |        | HD6        |        |
|------------|--------|------------|--------|
| Data point | pg/mL  | Data point | pg/mL  |
| -25 h      | >617.2 | -25 h      | >617.2 |
| -19 h      | >617.2 | - 19 h     | >617.2 |
| -1 h       | >617.2 | -1 h       | >617.2 |
| 4 h        | 420.3  | 4 h        | >617.2 |
| 24 h       | >617.2 | 24 h       | >617.2 |
| 30 h       | >617.2 | 30 h       | >617.2 |
| 48 h       | 478.4  | 48 h       | >617.2 |
| 54 h       | >617.2 | 54 h       | >617.2 |
| D3         | >617.2 |            |        |
| D4         | >617.2 |            |        |
| D6         | >617.2 |            |        |
| D6         | >617.2 |            |        |
| D7         | >617.2 |            |        |
| D7         | >617.2 |            |        |
| D8         | >617.2 |            |        |
| D8         | >617.2 |            |        |
| D9         | 236.5  |            |        |
| D9         | >617.2 |            |        |
| D10        | >617.2 |            |        |

**Supplementary Table S3:** Technical variability expressed as the coefficient of variation (CV) for each group of technical replications.

|                  | <b>Fe-FC</b> | <b>Fe-TAFC</b> |
|------------------|--------------|----------------|
| <b>Low dose</b>  | 0.047±0.010  | 0.071±0.033    |
| <b>High dose</b> | 0.051±0.007  | 0.065±0.016    |

**Supplementary Table S4:** The variability in biological replicates expressed as the coefficient of variation (CV) in the high-dose-infected animals. SEM: the standard error of the mean.

| <b>Time after inoculation</b> | <b>Siderophore</b> | <b>Mean (ng/mL)</b> | <b>±SEM (ng/mL)</b> | <b>CV</b> |
|-------------------------------|--------------------|---------------------|---------------------|-----------|
| 4 h                           | Fe-FC              | 4.3                 | 1.3                 | 0.783     |
|                               | Fe-TAFC            | 0.0                 | 0.0                 | NAN       |
| 24 h                          | Fe-FC              | 794.5               | 500.6               | 1.667     |
|                               | Fe-TAFC            | 3.1                 | 1.8                 | 1.493     |
| 30 h                          | Fe-FC              | 3 019.4             | 1 296.3             | 1.136     |
|                               | Fe-TAFC            | 36.0                | 23.1                | 1.698     |
| 48 h                          | Fe-FC              | 4 743.1             | 2 134.0             | 1.006     |
|                               | Fe-TAFC            | 442.7               | 247.5               | 1.250     |
| 54 h                          | Fe-FC              | 12 284.5            | 5 239.4             | 0.853     |
|                               | Fe-TAFC            | 1 470.1             | 849.0               | 1.155     |
